# Supplementary material
Source: PubMed Central journal article supplement (PMC4586075)
Supplement: NIHMS722121-supplement-Suppl_Data.pdf [file NIHMS722121-supplement-Suppl_Data.pdf]

Supplementary data to:

## Safety profile of boceprevir and telaprevir in chronic hepatitis C: Real world experience from HCV-TARGET

Stuart C. Gordon<sup>1,\*</sup>, Andrew J. Muir<sup>2</sup>, Joseph K. Lim<sup>3</sup>, Brian Pearlman<sup>4</sup>, Curtis K. Argo<sup>5</sup>, Ananthakrishnan Ramani<sup>6</sup>, Benedict Maliakkal<sup>7</sup>, Imtiaz Alam<sup>8</sup>, Thomas G. Stewart<sup>9</sup>, Monika Vainorius<sup>9</sup>, Joy Peter<sup>10</sup>, David R. Nelson<sup>10</sup>, Michael W. Fried<sup>9</sup>, K. Rajender Reddy<sup>11,\*</sup> on behalf of the HCV-TARGET study group

*<sup>1</sup>Department of Internal Medicine, Division of Gastroenterology-Hepatology, Henry Ford Hospital, Detroit, Michigan, USA; <sup>2</sup>Gastroenterology and Hepatology Research Group, Duke Clinical Research Institute, Durham, North Carolina, USA; <sup>3</sup>Yale Liver Center, Yale University School of Medicine, New Haven, Connecticut, USA; <sup>4</sup>Center for Hepatitis C, Atlanta Medical Center, Atlanta, Georgia, USA; <sup>5</sup>University of Virginia, Charlottesville, VA, USA; <sup>6</sup>Columbia Memorial Hospital, Hudson, NY, USA; <sup>7</sup>Strong Memorial Hospital/University of Rochester, Rochester, NY, USA; <sup>8</sup>Austin Hepatitis Center, Austin, TX, USA; <sup>9</sup>UNC Liver Center, University of North Carolina, Chapel Hill, North Carolina, USA; <sup>10</sup>University of Florida, Division of Gastroenterology, Hepatology and Nutrition, Gainesville, Florida, USA; <sup>11</sup>University of Pennsylvania, Philadelphia, Pennsylvania, USA*

### Table of Contents

|                               |   |
|-------------------------------|---|
| HCV-TARGET investigators..... | 2 |
| Supplementary Table .....     | 5 |

## HCV-TARGET investigators

The members of the HCV-TARGET study were as follow: *G. Abraham*, Partners in Internal Medicine, PC, Worcester, MA; *N. Afdhal*, Harvard University, Boston, MA; *I. Alam*, Austin Hepatitis Center, Austin, TX; *V. Ankoma-Sey*, Liver Associates of Texas, PA, Houston, TX; *C. K. Argo*, University of Virginia, Charlottesville, VA; *A. Aronsohn*, University of Chicago, Chicago, IL; *L. A. Balart*, Tulane University Health Sciences Center, New Orleans, LA; *A. Balistreri*, DeKalb Gastroenterology Associates, LLC, Decatur, GA; *K. L. Beavers*, Asheville Gastroenterology, Asheville, NC; *A. L. Berman*, Florida Center for Gastroenterology, Largo, FL; *D. E. Bernstein*, North Shore University Hospital, Manhasset, NY; *J. Bloomer*, University of Alabama at Birmingham, Birmingham, AL; *G. E. Catinis*, New Orleans Research Institute, New Orleans, LA; *M. R. Charlton*, Mayo Clinic, Rochester, MN; *A. G. Coates*, Gastroenterology Associates of Western Michigan, PLC, Wyoming, MI; *M. E. De Vera*, Loma Linda Transplantation Institute, Loma Linda, CA; *A. M. Di Bisceglie*, Saint Louis University, Saint Louis, MO; *R. C. Dickson*, Dartmouth-Hitchcock Medical Center, Lebanon, NH; *A. Duchini*, University of Texas Medical Branch, Gavelston, TX; *H. A. Elbeshbeshy*, Baptist Medical Center, Oklahoma City, OK; *H. El-Genaidi*, Lourdes Medical Associates, Egg Harbor Township, NJ; *G. Everson*, University of Colorado, Aurora, CO; *J. M. Fenkel*, Thomas Jefferson University, Philadelphia, PA; *E. Feysa*, Albert Einstein Medical Center, Center for Liver Disease and Transplantation, Philadelphia, PA; *M. W. Fried*, University of North Carolina at Chapel Hill, Chapel Hill, NC; *P. J. Gaglio*, Montefiore Medical Center, Bronx, NY; *J. Galati*, The Methodist Hospital, Houston, TX; *G. W. Galler*, Kelsey Research Foundation, Houston, TX; *J. A. Giron*, Orlando Infectious Disease Center, Orlando, FL; *S. C. Gordon*, Henry Ford Hospital, Detroit, MI; *M. Hassan*, University of Minnesota, Minneapolis, MN; *F. Hinestrosa*, Orlando Immunology Center, Orlando, FL; *S. Ho*, VA San Diego Healthcare System, San Diego, CA; *I. M. Jacobson*, Weill Cornell, New York City, NY; *M. E. Jones*, Tri-State Gastroenterology Associates, Crestview Hills, KY; *S. Joshi*, Ochsner Clinic Foundation, New Orleans, LA; *C. A. Kerr*, Hudson River Health Care, Peekskill, NY; *K. V. Kowdley*, Virginia Mason Medical Center, Seattle, WA; *A.*

*Kuo*, University of California-San Diego, San Diego, CA; *P. Y. Kwo*, Indiana University, Indianapolis, IN; *S. Lidofsky*, Fletcher Allen Health Care, Inc., Burlington, VT; *J. Lim*, Yale University, New Haven, CT; *R. L. Lindenberg*, Litchfield County Gastroenterology Associates, LLC, Torrington, CT; *A. Lok*, University of Michigan, Ann Harbor, MI; *J. E. Lutz*, Bend Memorial Clinic, Bend, OR; *A. Maheshwari*, Mercy Medical Center, Baltimore, MD; *M. A. Mah'moud*, Boice-Willis Clinic, PA, Rocky Mount, NC; *M. Mailliard*, University of Nebraska, Omaha, NE; *B. J. Maliakkal*, University of Rochester, Rochester, NY; *D. Marks*, Clinical Research Consultants, Inc., Hoover, AL; *E. A. Mena*, Huntington Medical Research Institutes Liver Center, Pasadena, CA; *C. L. Meyer*, Wilmington Gastroenterology Associates, Wilmington, NC; *S. R. Mohanty*, New York Methodist Hospital, Brooklyn, NY; *G. Morelli*, University of Florida, Gainesville, FL; *A. Mubarak*, Methodist Transplant Physicians, Dallas, TX; *A. J. Muir*, Duke University, Durham, NC; *A. Mushahwar*, Center for Advanced Gastroenterology PLLC, Maitland, FL; *M. G. Mutchnick*, Wayne State University Physician Group, Detroit, MI; *S. Nair*, Methodist Healthcare University Hospital, Memphis, TN; *G. W. Neff*, Tampa General Hospital, Tampa, FL; *L. M. Nyberg*, Kaiser Permanente, San Diego, CA; *A. Paez*, Baystate Medical Center, Springfield, MA; *C. Q. Pan*, Medical Procure, PLLC, Flushing, NY; *P. Pandya*, Kansas City VA Medical Center in care of Midwest Biomedical Research Foundation, Kansas City, MO; *B. L. Pearlman*, Atlanta Medical Center, Atlanta, GA; *E. Piken*, South Bay Gastroenterology Medical Group, Torrance, CA; *P. Pockros*, Scripps Health, La Jolla, CA; *D. Pound*, Indianapolis Gastroenterology Research Foundation, Indianapolis, IN; *A. Ramani*, Mountain View Medical, Catskill, NY; *D. B. Rausher*, MD Atlanta Center for Gastroenterology PC, Atlanta, GA; *N. Reau*, University of Chicago, Chicago, IL; *G. N. Reddy*, Digestive and Liver Disease Consultants, PA, Houston, TX; *K. R. Reddy*, University of Pennsylvania, Philadelphia, PA; *F. G. Regenstein*, Saint Luke's Liver Disease and Transplant Specialists, Kansas City, MO; *M. Rodriguez-Torres*, University of Puerto Rico, San Juan, PR; *V. K. Rustgi*, Metropolitan Research, Fairfax, VA; *J. J. Santoro*, Atlantic Gastroenterology Associates, Egg Harbor Township, NJ; *E. R. Schiff*, University of Miami, Miami, FL; *S. Sedghi*, Gastroenterology Associates of Central Georgia, LLC, Macon, GA; *K. E. Sherman*, University of Cincinnati, Cincinnati, OH; *C. Smith*, University of Minnesota, Minneapolis,

MN; *J. R. Spivey*, Emory University, Atlanta, GA; *T. R. Stainbrook*, DuBois Regional Medical Center, DuBois, PA; *R. K. Sterling*, Virginia Commonwealth University, Richmond, VA; *A. D. Stone*, Commonwealth Clinical Studies, Brockton, MA; *M. S. Sulkowski*, Johns Hopkins, Baltimore, MD; *G. Szabo*, University of Massachusetts, Worcester, MA; *N. A. Terrault*, University of California-San Francisco, San Francisco, CA; *H. Tobias*, Concorde Medical Group PLLC, New York, NY; *H. E. Vargas*, Mayo Clinic, Phoenix, AZ; *D. A. Warner*, Daniel Warner Consultative Medicine, Daytona Beach, FL; *A. Williams*, Liver Wellness Center, Little Rock, AR.

## Supplementary Table

### Supplementary Table 1. Key baseline characteristics, patient disposition, sustained virologic response, safety profile, and anaemia management in patients with cirrhosis.

|                                                            | Patients with cirrhosis but no history of decompensation (n = 712) | Patients with cirrhosis and a history of decompensation (n = 76) | All patients with cirrhosis (n = 788) |
|------------------------------------------------------------|--------------------------------------------------------------------|------------------------------------------------------------------|---------------------------------------|
| Key baseline characteristics                               |                                                                    |                                                                  |                                       |
| History of varices, n/N (%)                                | 210/418 (50)                                                       | 47/67 (70)                                                       | 257/485 (53)                          |
| History of ascites, n (%)                                  | 33 (5)                                                             | 31 (41)                                                          | 64 (8)                                |
| Mean MELD score (range)                                    | 8.1 (6.0-21.0)                                                     | 9.6 (6.0-17.0)                                                   | 8.2 (6.0-21.0)                        |
| Mean APRI (range)                                          | 2.5 (0.2-17.1)                                                     | 3.5 (0.4-12.3)                                                   | 2.6 (0.2-17.1)                        |
| History of diabetes, n (%)                                 | 137 (19)                                                           | 18 (24)                                                          | 155 (20)                              |
| Mean platelets (range) (x10 <sup>3</sup> )<br>count per µl | 125 (25-447)                                                       | 96 (32-262)                                                      | 122 (25-447)                          |
| Mean albumin (range), g/dl                                 | 3.9 (1.0-5.0)                                                      | 3.5 (1.9-4.8)                                                    | 3.9 (1.0-5.0)                         |
| DAA, n (%)                                                 |                                                                    |                                                                  |                                       |
| Boceprevir                                                 | 134 (19)                                                           | 6 (8)                                                            | 140 (18)                              |
| Telaprevir                                                 | 578 (81)                                                           | 70 (92)                                                          | 648 (82)                              |
| Patient disposition during treatment, n (%)                |                                                                    |                                                                  |                                       |
| Completed therapy                                          | 372 (52)                                                           | 31 (41)                                                          | 403 (51)                              |
| Discontinued early                                         | 335 (47)                                                           | 45 (59)                                                          | 380 (48)                              |
| Adverse event                                              | 150 (21)                                                           | 29 (38)                                                          | 179 (23)                              |
| Lack of efficacy                                           | 153 (21)                                                           | 14 (18)                                                          | 167 (21)                              |
| Lost to follow-up                                          | 21 (3)                                                             | 1 (<1)                                                           | 22 (3)                                |
| Other                                                      | 11 (2)                                                             | 1 (<1)                                                           | 12 (2)                                |

|                                             |                 |                |                 |
|---------------------------------------------|-----------------|----------------|-----------------|
| Missing EOT data                            | 5 (<1)          | 0              | 5 (<1)          |
| Sustained virologic response, n (%; 95% CI) | 306 (43; 39-47) | 36 (47; 36-59) | 342 (43; 40-47) |
| Adverse events, n (%)                       | 688 (97)        | 74 (97)        | 762 (97)        |
| Anaemia                                     | 488 (69)        | 63 (83)        | 551 (70)        |
| Rash                                        | 399 (56)        | 38 (50)        | 437 (55)        |
| Anorectal symptoms                          | 250 (35)        | 27 (36)        | 277 (35)        |
| Infection                                   | 122 (17)        | 16 (21)        | 138 (18)        |
| Decompensating event                        | 41 (6)          | 18 (24)        | 59 (7)          |
| Dysgeusia                                   | 31 (4)          | 2 (3)          | 33 (4)          |
| Serious adverse events, n (%)               | 92 (13)         | 25 (33)        | 117 (15)        |
| Anaemia                                     | 29 (4)          | 8 (11)         | 37 (5)          |
| Infection                                   | 30 (4)          | 7 (9)          | 37 (5)          |
| Decompensation                              | 8 (1)           | 6 (8)          | 14 (2)          |
| Rash                                        | 5 (<1)          | 1 (<1)         | 6 (<1)          |
| Anorectal symptoms                          | 4 (<1)          | 1 (<1)         | 5 (<1)          |
| Dysgeusia                                   | 0               | 0              | 0               |
| Anaemia management, n (%)                   |                 |                |                 |
| Ribavirin dose reduction                    | 345 (48)        | 40 (53)        | 385 (49)        |
| Epoetin use                                 | 290 (41)        | 38 (50)        | 328 (42)        |
| Blood transfusion                           | 106 (15)        | 16 (21)        | 122 (15)        |
| Ribavirin interruptions                     | 23 (3)          | 3 (4)          | 26 (3)          |
| Deaths, n                                   | 2               | 1              | 3               |
